# Supplementary material for: A pooled analysis of mesenchymal stem cell-based therapy for liver disease
Source: PubMed Central journal article supplement (PMC5863358; doi:10.1186/s13287-018-0816-2), 2018-03-21
Supplement: 13287_2018_816_MOESM1_ESM.pdf [file 13287_2018_816_MOESM1_ESM.pdf]

## Web appendix

### Search strategy:

#### Medline (PubMed)

- #1 liver
- #2 liver [MeSH Terms]
- #3 liver diseases [MeSH Terms]
- #4 #1 or #2 or #3
- #5 “mesenchymal stem cell\*”
- #6 “multipotent stromal cell\*”
- #7 “Mesenchymal Stromal Cells”[Mesh]
- #8 “Mesenchymal Stem Cell Transplantation”[Mesh]
- #9 #5 or #6 or #7 or #8
- #10 #4 and #9 filters: clinical trial

#### Cochrane Library

- #1 MeSH descriptor: [Mesenchymal Stromal Cells] explode all trees
- #2 “mesenchymal stem cell\*” or “multipotent stromal cell\*”
- #3 (#1 or #2)
- #4 MeSH descriptor: [Liver Diseases] explode all trees
- #5 hepatitis or "hepatic fibrosis" or "liver fibrosis" or "liver cirrhosis" or "Liver Neoplasm\*" or "Liver Failure" or "Fatty Liver" or "Liver Abscess" or "Liver Injury"
- #6 liver
- #7 MeSH descriptor: [Liver] explode all trees
- #8 (#4 or #5 or #6 or #7)
- #9 (#3 and #8)

#### EMBASE

- #1 “mesenchymal stem cell”/exp OR “mesenchymal stem cell”
- #2 “liver” /exp OR “liver”
- #3 #1 AND #2

#### SinoMed CBM

((("mesenchymal stem cell\*" [unweighted: extension]) OR "multipotent stromal cell\*" [unweighted: extension]) OR "totipotential stem cell" [unweighted: extension]) AND "liver diseases" [unweighted: extension]

#### linicalTrials.gov

“Mesenchymal stem cells” and “liver” |studies with Results
