# Supplementary material for: A pooled analysis of mesenchymal stem cell-based therapy for liver disease
Source: PubMed Central journal article supplement (PMC5863358; doi:10.1186/s13287-018-0816-2), 2018-03-21
Supplement: 13287_2018_816_MOESM2_ESM.pdf [file 13287_2018_816_MOESM2_ESM.pdf]

## Results of sensitivity analyses with omission of one study at a time:

\* Sensitivity analyses were not performed at weeks 36 and 48 because there were just two studies.

### --MELD

#### Week 2

## Influential analysis (Random effects model)

##

| ##                             | SMD 95%-CI                       | p-value       | tau^2         | I^2           |
|--------------------------------|----------------------------------|---------------|---------------|---------------|
| ## Omitting Amer M E,2011      | -0.9096 [-1.9709; 0.1517]        | 0.0930        | 1.0503        | 90.40%        |
| ## Omitting L. Peng, 2011      | -0.9746 [-1.9174; -0.0317]       | 0.0428        | 0.8323        | 90.20%        |
| <b>## Omitting L. Xu, 2014</b> | <b>-0.5199 [-1.0478; 0.0080]</b> | <b>0.0536</b> | <b>0.1852</b> | <b>65.10%</b> |
| ## Omitting Z. Zhang, 2012     | -1.1466 [-1.9036; -0.3895]       | 0.0030        | 0.4721        | 80.00%        |
| ## Omitting B. Liu, 2013       | -0.8586 [-1.8763; 0.1592]        | 0.0983        | 0.9620        | 90.20%        |
| ##                             |                                  |               |               |               |
| ## Pooled estimate             | -0.8807 [-1.6706; -0.0907]       | 0.0289        | 0.6992        | 87.20%        |

#### Week 4

## Influential analysis (Random effects model)

##

| ##                             | SMD 95%-CI                       | p-value       | tau^2         | I^2           |
|--------------------------------|----------------------------------|---------------|---------------|---------------|
| ## Omitting Amer M E,2011      | -0.7162 [-1.4277; -0.0047]       | 0.0485        | 0.8024        | 92.10%        |
| ## Omitting Lin B-L,2017       | -0.8723 [-1.6381; -0.1065]       | 0.0256        | 0.9390        | 91.80%        |
| ## Omitting L. Peng, 2011      | -0.6818 [-1.3627; -0.0009]       | 0.0497        | 0.7434        | 92.20%        |
| <b>## Omitting L. Xu, 2014</b> | <b>-0.2015 [-0.4685; 0.0655]</b> | <b>0.1392</b> | <b>0.0577</b> | <b>48.20%</b> |
| ## Omitting Z. Zhang, 2012     | -0.8296 [-1.5654; -0.0937]       | 0.0271        | 0.8637        | 92.50%        |
| ## Omitting H. He, 2015        | -0.8425 [-1.6335; -0.0514]       | 0.0369        | 1.0102        | 92.40%        |
| ## Omitting Y. Li, 2015        | -0.8377 [-1.5896; -0.0858]       | 0.0290        | 0.9042        | 92.40%        |
| ## Omitting Q. Wang, 2013      | -0.7888 [-1.4759; -0.1016]       | 0.0245        | 0.7641        | 92.50%        |
| ##                             |                                  |               |               |               |
| ## Pooled estimate             | -0.7188 [-1.3523; -0.0852]       | 0.0262        | 0.7218        | 91.30%        |

#### Week 8

## Influential analysis (Random effects model)

##

| ##                             | SMD 95%-CI                       | p-value       | tau^2         | I^2           |
|--------------------------------|----------------------------------|---------------|---------------|---------------|
| ## Omitting Amer M E,2011      | -0.6417 [-1.3635; 0.0802]        | 0.0815        | 0.6131        | 92.10%        |
| ## Omitting Lin B-L,2017       | -0.8231 [-1.5749; -0.0712]       | 0.0319        | 0.6612        | 91.30%        |
| <b>## Omitting L. Xu, 2014</b> | <b>-0.2559 [-0.5586; 0.0467]</b> | <b>0.0974</b> | <b>0.0687</b> | <b>58.60%</b> |
| ## Omitting Z. Zhang, 2012     | -0.7999 [-1.5342; -0.0657]       | 0.0327        | 0.6339        | 92.10%        |
| ## Omitting H. He,2015         | -0.7881 [-1.5883; 0.0121]        | 0.0536        | 0.7577        | 92.10%        |
| ## Omitting Y. Li,2015         | -0.6879 [-1.4500; 0.0742]        | 0.0769        | 0.6851        | 92.30%        |
| ##                             |                                  |               |               |               |
| ## Pooled estimate             | -0.6587 [-1.2797; -0.0376]       | 0.0376        | 0.5351        | 90.60%        |

## Week 12

## Influential analysis (Random effects model)

##

| ##                             | SMD 95%-CI                        | p-value       | tau <sup>2</sup> | I <sup>2</sup> |
|--------------------------------|-----------------------------------|---------------|------------------|----------------|
| ## Omitting Lin B-L,2017       | -0.9292 [-1.5316; -0.3269]        | 0.0025        | 0.6359           | 87.60%         |
| ## Omitting Mehdi M, 2013      | -0.9271 [-1.5058; -0.3485]        | 0.0017        | 0.5892           | 88.70%         |
| ## Omitting L. Peng, 2011      | -0.7632 [-1.3312; -0.1951]        | 0.0085        | 0.5752           | 88.90%         |
| <b>## Omitting L. Xu, 2014</b> | <b>-0.4820 [-0.8126; -0.1514]</b> | <b>0.0043</b> | <b>0.1374</b>    | <b>65.40%</b>  |
| ## Omitting Z. Zhang, 2012     | -0.9205 [-1.5173; -0.3238]        | 0.0025        | 0.6264           | 88.60%         |
| ## Omitting H. He,2015         | -0.8382 [-1.4877; -0.1887]        | 0.0114        | 0.7574           | 89.10%         |
| ## Omitting Y. Li,2015         | -0.8884 [-1.5128; -0.2640]        | 0.0053        | 0.6940           | 89.20%         |
| ## Omitting B. Liu, 2013       | -0.7841 [-1.3656; -0.2026]        | 0.0082        | 0.5983           | 89.00%         |
| ## Omitting El-Ansary M,2012   | -0.7896 [-1.3664; -0.2129]        | 0.0073        | 0.5928           | 89.10%         |
| ##                             |                                   |               |                  |                |
| ## Pooled estimate             | -0.8131 [-1.3484; -0.2778]        | 0.0029        | 0.5625           | 87.80%         |

## Week 24

## Influential analysis (Random effects model)

##

| ##                             | SMD 95%-CI                        | p-value       | tau <sup>2</sup> | I <sup>2</sup> |
|--------------------------------|-----------------------------------|---------------|------------------|----------------|
| ## Omitting Amer M E,2011      | -1.4342 [-2.7186; -0.1497]        | 0.0286        | 1.9876           | 94.60%         |
| ## Omitting Lin B-L,2017       | -1.6277 [-2.8746; -0.3807]        | 0.0105        | 1.8552           | 93.10%         |
| ## Omitting L. Peng, 2011      | -1.3549 [-2.5151; -0.1947]        | 0.0221        | 1.6213           | 94.60%         |
| <b>## Omitting L. Xu, 2014</b> | <b>-0.6481 [-1.1660; -0.1303]</b> | <b>0.0142</b> | <b>0.2394</b>    | <b>72.50%</b>  |
| ## Omitting Z. Zhang, 2012     | -1.5855 [-2.8822; -0.2887]        | 0.0166        | 2.0255           | 94.40%         |
| ## Omitting El-Ansary M,2012   | -1.3423 [-2.5044; -0.1803]        | 0.0236        | 1.6237           | 94.50%         |
| ##                             |                                   |               |                  |                |
| ## Pooled estimate             | -1.3308 [-2.3428; -0.3188]        | 0.0100        | 1.4543           | 93.40%         |
