# Supplementary material for: A pooled analysis of mesenchymal stem cell-based therapy for liver disease
Source: PubMed Central journal article supplement (PMC5863358; doi:10.1186/s13287-018-0816-2), 2018-03-21
Supplement: 13287_2018_816_MOESM3_ESM.pdf [file 13287_2018_816_MOESM3_ESM.pdf]

## Results of sensitivity analyses with omission of one study at a time:

\* Sensitivity analyses were not performed at weeks 36 and 48 because there were just two studies.

### --ALB level

#### Week 2

## Influential analysis (Random effects model)

##

| ##                             | SMD 95%-CI                     | p-value       | tau <sup>2</sup> | I <sup>2</sup> |
|--------------------------------|--------------------------------|---------------|------------------|----------------|
| ## Omitting L. Peng, 2011      | 0.7263 [0.1880; 1.2645]        | 0.0082        | 0.4823           | 81.90%         |
| ## Omitting Salama H,2014      | 0.6769 [0.1326; 1.2211]        | 0.0148        | 0.4819           | 80.80%         |
| <b>## Omitting L. Xu, 2014</b> | <b>0.4612 [0.1623; 0.7601]</b> | <b>0.0025</b> | <b>0.0730</b>    | <b>40.50%</b>  |
| ## Omitting Z. Zhang, 2012     | 0.8008 [0.2515; 1.3501]        | 0.0043        | 0.4912           | 80.80%         |
| ## Omitting B. Liu, 2013       | 0.7590 [0.2022; 1.3157]        | 0.0075        | 0.5115           | 81.80%         |
| ## Omitting H. Luo,2015        | 0.7594 [0.1539; 1.3649]        | 0.0140        | 0.6167           | 81.90%         |
| ## Omitting L. Tong,2015       | 0.8454 [0.3413; 1.3494]        | 0.0010        | 0.3932           | 77.10%         |
| ## Omitting J. Yu,2012         | 0.7764 [0.2232; 1.3297]        | 0.0059        | 0.5033           | 81.60%         |
| ## Omitting Y. Zhang,2012      | 0.6898 [0.1473; 1.2322]        | 0.0127        | 0.4830           | 81.40%         |
| ##                             |                                |               |                  |                |
| ## Pooled estimate             | 0.7187 [0.2254; 1.2120]        | 0.0043        | 0.4378           | 79.30%         |

#### Week 4

## Influential analysis (Random effects model)

##

| ##                             | SMD 95%-CI                     | p-value       | tau <sup>2</sup> | I <sup>2</sup> |
|--------------------------------|--------------------------------|---------------|------------------|----------------|
| ## Omitting H. Luo,2015        | 0.4188 [0.0805; 0.7571]        | 0.0153        | 0.3046           | 77.20%         |
| ## Omitting H. He,2015         | 0.4182 [0.0794; 0.7569]        | 0.0155        | 0.3055           | 77.10%         |
| ## Omitting J. Yu,2012         | 0.4427 [0.1187; 0.7668]        | 0.0074        | 0.2776           | 77.10%         |
| ## Omitting Lin B-L,2017       | 0.4619 [0.1345; 0.7893]        | 0.0057        | 0.2788           | 75.50%         |
| ## Omitting L. Zhuang,2014     | 0.4214 [0.0888; 0.7540]        | 0.0130        | 0.2931           | 77.30%         |
| ## Omitting L. Tong,2015       | 0.4590 [0.1377; 0.7803]        | 0.0051        | 0.2697           | 76.40%         |
| ## Omitting M. Zhu,2013        | 0.4069 [0.0815; 0.7324]        | 0.0143        | 0.2793           | 77.00%         |
| ## Omitting L. Peng, 2011      | 0.3903 [0.0757; 0.7049]        | 0.0150        | 0.2625           | 76.60%         |
| ## Omitting Salama H,2014      | 0.3534 [0.0520; 0.6548]        | 0.0216        | 0.2277           | 73.50%         |
| ## Omitting S. Ouyang,2013     | 0.4464 [0.1149; 0.7778]        | 0.0083        | 0.2900           | 77.00%         |
| <b>## Omitting L. Xu, 2014</b> | <b>0.2891 [0.0568; 0.5213]</b> | <b>0.0147</b> | <b>0.1033</b>    | <b>56.20%</b>  |
| ## Omitting Y. Li,2015         | 0.4528 [0.1253; 0.7802]        | 0.0067        | 0.2814           | 76.70%         |
| ## Omitting Y. Zhang,2012      | 0.3956 [0.0760; 0.7152]        | 0.0153        | 0.2691           | 76.80%         |
| ## Omitting Z. Zhang, 2012     | 0.4746 [0.1619; 0.7873]        | 0.0029        | 0.2506           | 75.10%         |
| ## Omitting Q. Wang,2013       | 0.4707 [0.1634; 0.7780]        | 0.0027        | 0.2472           | 75.60%         |
| ##                             |                                |               |                  |                |
| ## Pooled estimate             | 0.4191 [0.1128; 0.7254]        | 0.0073        | 0.2605           | 75.60%         |

#### Week 8

## Influential analysis (Random effects model)

##

| ##                             | SMD 95%-CI                     | p-value       | tau^2         | I^2           |
|--------------------------------|--------------------------------|---------------|---------------|---------------|
| ## Omitting H. He,2015         | 0.6162 [0.0117; 1.2207]        | 0.0457        | 0.4643        | 83.10%        |
| ## Omitting Lin B-L,2017       | 0.6852 [0.1283; 1.2421]        | 0.0159        | 0.3804        | 80.80%        |
| ## Omitting M. Zhu,2013        | 0.5822 [0.0291; 1.1352]        | 0.0391        | 0.3831        | 82.90%        |
| <b>## Omitting L. Xu, 2014</b> | <b>0.3025 [0.0637; 0.5413]</b> | <b>0.0130</b> | <b>0.0162</b> | <b>18.10%</b> |
| ## Omitting Y. Li,2015         | 0.6622 [0.0996; 1.2248]        | 0.0211        | 0.3942        | 82.40%        |
| ## Omitting Y. Zhang,2012      | 0.5489 [0.0178; 1.0799]        | 0.0428        | 0.3535        | 82.50%        |
| ## Omitting Z. Zhang, 2012     | 0.6852 [0.1531; 1.2174]        | 0.0116        | 0.3480        | 81.50%        |
| ##                             |                                |               |               |               |
| ## Pooled estimate             | 0.5769 [0.1005; 1.0533]        | 0.0176        | 0.3189        | 79.80%        |

**Week 12**

## Influential analysis (Random effects model)

##

| ##                             | SMD 95%-CI                     | p-value       | tau^2         | I^2           |
|--------------------------------|--------------------------------|---------------|---------------|---------------|
| ## Omitting B. Liu, 2013       | 0.5123 [0.1573; 0.8673]        | 0.0047        | 0.3497        | 80.20%        |
| ## Omitting H. Luo,2015        | 0.5897 [0.2136; 0.9657]        | 0.0021        | 0.3945        | 80.20%        |
| ## Omitting H. He,2015         | 0.5746 [0.1914; 0.9577]        | 0.0033        | 0.4136        | 80.90%        |
| ## Omitting Lin B-L,2017       | 0.6124 [0.2601; 0.9647]        | 0.0007        | 0.3335        | 77.90%        |
| ## Omitting L. Zhuang,2014     | 0.5108 [0.1522; 0.8694]        | 0.0052        | 0.3510        | 79.30%        |
| ## Omitting L. Tong,2015       | 0.5527 [0.1848; 0.9207]        | 0.0032        | 0.3779        | 80.90%        |
| ## Omitting Mehdi M, 2013      | 0.6210 [0.2787; 0.9633]        | 0.0004        | 0.3178        | 78.60%        |
| ## Omitting L. Peng, 2011      | 0.5043 [0.1539; 0.8546]        | 0.0048        | 0.3421        | 80.00%        |
| ## Omitting Salama H,2014      | 0.4919 [0.1435; 0.8403]        | 0.0057        | 0.3291        | 78.90%        |
| ## Omitting S. Ouyang,2013     | 0.5868 [0.2150; 0.9586]        | 0.0020        | 0.3845        | 80.50%        |
| <b>## Omitting L. Xu, 2014</b> | <b>0.4308 [0.1207; 0.7409]</b> | <b>0.0065</b> | <b>0.2424</b> | <b>73.60%</b> |
| ## Omitting Y. Li,2015         | 0.6050 [0.2458; 0.9643]        | 0.0010        | 0.3526        | 79.30%        |
| ## Omitting Y. Zhang,2012      | 0.5092 [0.1544; 0.8640]        | 0.0049        | 0.3477        | 80.00%        |
| ## Omitting Z. Zhang, 2012     | 0.5722 [0.2043; 0.9400]        | 0.0023        | 0.3775        | 80.90%        |
| ## Omitting El-Ansary M,2012   | 0.4944 [0.1461; 0.8426]        | 0.0054        | 0.3337        | 79.50%        |
| ##                             |                                |               |               |               |
| ## Pooled estimate             | 0.5443 [0.2003; 0.8882]        | 0.0019        | 0.3479        | 79.50%        |

**Week 24**

## Influential analysis (Random effects model)

##

| ##                         | SMD 95%-CI              | p-value | tau^2  | I^2    |
|----------------------------|-------------------------|---------|--------|--------|
| ## Omitting Lin B-L,2017   | 0.9122 [0.3852; 1.4391] | 0.0007  | 0.5177 | 82.30% |
| ## Omitting L. Zhuang,2014 | 0.8145 [0.2405; 1.3885] | 0.0054  | 0.6392 | 85.50% |
| ## Omitting L. Tong,2015   | 0.8584 [0.3003; 1.4166] | 0.0026  | 0.6018 | 85.40% |
| ## Omitting L. Peng, 2011  | 0.7790 [0.2442; 1.3138] | 0.0043  | 0.5576 | 85.40% |
| ## Omitting Salama H,2014  | 0.6839 [0.1865; 1.1812] | 0.0070  | 0.4578 | 82.20% |

|                                |                                |               |               |               |
|--------------------------------|--------------------------------|---------------|---------------|---------------|
| ## Omitting S. Ouyang,2013     | 0.8918 [0.3355; 1.4481]        | 0.0017        | 0.5918        | 84.20%        |
| ## Omitting Suk KT,2017        | 0.8608 [0.2967; 1.4248]        | 0.0028        | 0.6150        | 85.40%        |
| <b>## Omitting L. Xu, 2014</b> | <b>0.5496 [0.1674; 0.9318]</b> | <b>0.0048</b> | <b>0.2327</b> | <b>70.80%</b> |
| ## Omitting Z. Zhang, 2012     | 0.8485 [0.2886; 1.4085]        | 0.0030        | 0.6065        | 85.50%        |
| ## Omitting El-Ansary M,2012   | 0.7360 [0.2106; 1.2614]        | 0.0060        | 0.5307        | 84.60%        |
| ##                             |                                |               |               |               |
| ## Pooled estimate             | 0.7923 [0.2914; 1.2932]        | 0.0019        | 0.5287        | 83.80%        |
