# Supplementary material for: A pooled analysis of mesenchymal stem cell-based therapy for liver disease
Source: PubMed Central journal article supplement (PMC5863358; doi:10.1186/s13287-018-0816-2), 2018-03-21
Supplement: 13287_2018_816_MOESM4_ESM.pdf [file 13287_2018_816_MOESM4_ESM.pdf]

**Visualized results of publication bias of ALB**

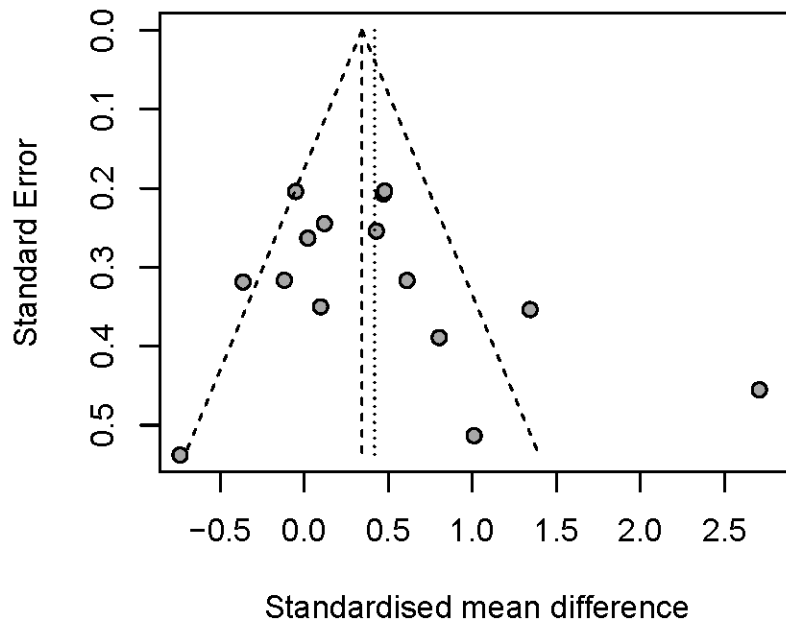

**Figure S1. Bias assessment plot for ALB level at week 4**

*\*p=0.28*

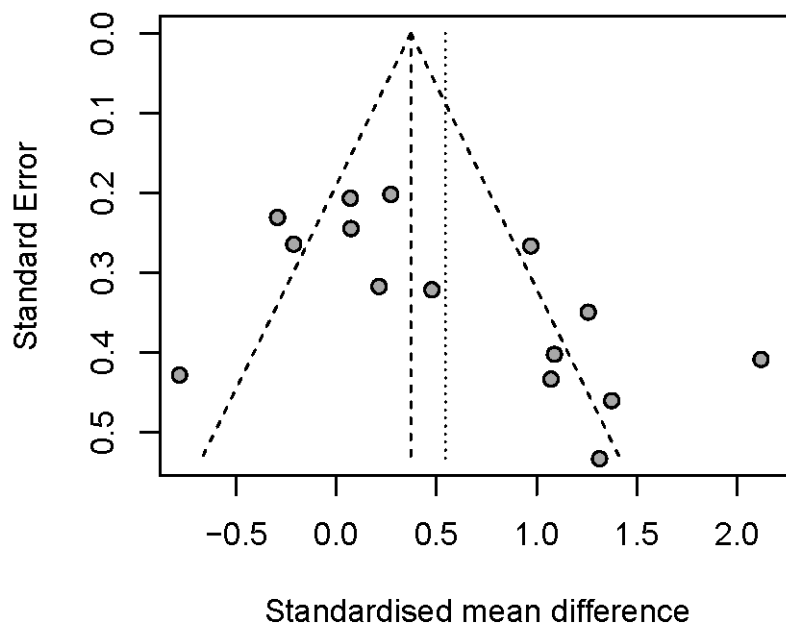

**Figure S2. Bias assessment plot for ALB level at week 12**

*\*p=0.03*

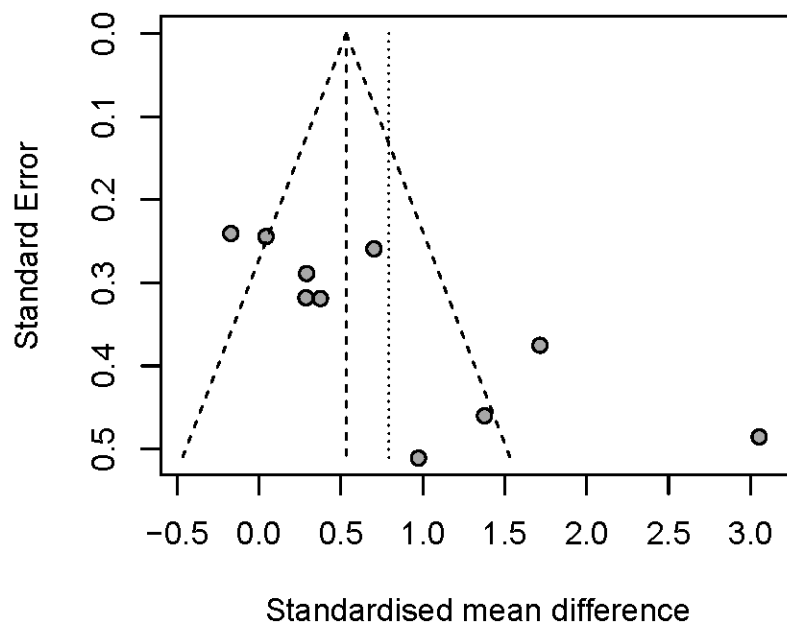

**Figure S3. Bias assessment plot for ALB level at week 24**

*\* p < 0.01*
