# Supplementary material for: A pooled analysis of mesenchymal stem cell-based therapy for liver disease
Source: PubMed Central journal article supplement (PMC5863358; doi:10.1186/s13287-018-0816-2), 2018-03-21
Supplement: 13287_2018_816_MOESM5_ESM.pdf [file 13287_2018_816_MOESM5_ESM.pdf]

**Results of symmetrical contour-enhanced funnel plots combined with trim and fill analysis of ALB:**

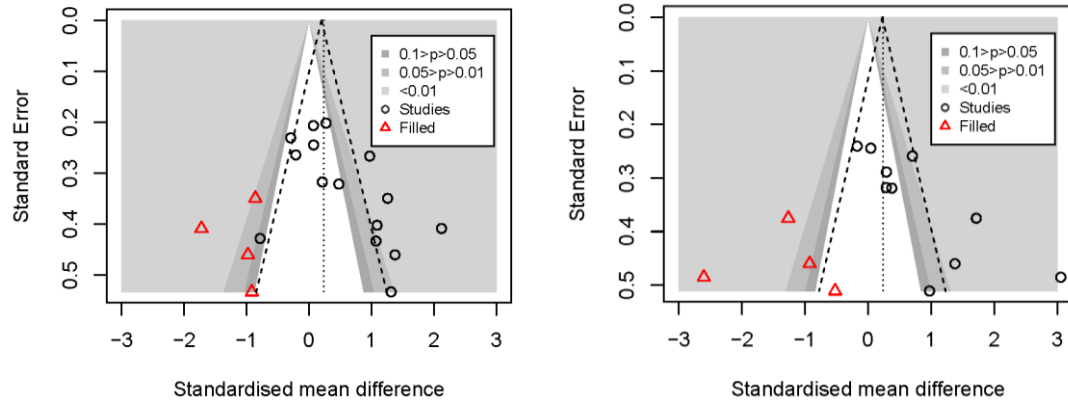

**Figure S10 Symmetrical contour-enhanced funnel plots for ALB at weeks 12 and 24**

At week 12, four hypothetical studies were filled, and all plotted in the area of statistical significant (*i.e.*, the shaded area), indicating that the asymmetry at week 12 was not caused by publication bias; at the week 24, four hypothetical studies were filled: three plotted in the area of statistical significant and one in the area of statistical nonsignificant, indicating that the asymmetry at week 24 was partly caused by publication bias.
