# Supplementary material for: A pooled analysis of mesenchymal stem cell-based therapy for liver disease
Source: PubMed Central journal article supplement (PMC5863358; doi:10.1186/s13287-018-0816-2), 2018-03-21
Supplement: 13287_2018_816_MOESM6_ESM.pdf [file 13287_2018_816_MOESM6_ESM.pdf]

## Results of sensitivity analyses with omission of one study at a time:

\* Sensitivity analyses were not performed at weeks 36 and 48 because there were just two studies.

### --ALT level

#### Week 2

## Influential analysis (Random effects model)

##

| ##                             | SMD 95%-CI                       | p-value       | tau <sup>2</sup> | I <sup>2</sup> |
|--------------------------------|----------------------------------|---------------|------------------|----------------|
| ## Omitting L. Peng, 2011      | -0.4150 [-0.8401; 0.0101]        | 0.0557        | 0.1808           | 65.70%         |
| ## <b>Omitting L. Xu, 2014</b> | <b>-0.3224 [-0.6622; 0.0175]</b> | <b>0.0630</b> | <b>0.0721</b>    | <b>41.30%</b>  |
| ## Omitting H. Lin, 2012       | -0.4702 [-0.9515; 0.0111]        | 0.0555        | 0.2382           | 68.60%         |
| ## Omitting H. Luo, 2015       | -0.5132 [-1.0288; 0.0024]        | 0.0511        | 0.2789           | 68.30%         |
| ## Omitting L. Tong, 2015      | -0.5913 [-0.9924; -0.1902]       | 0.0039        | 0.1336           | 55.50%         |
| ## Omitting J. Yu, 2012        | -0.4371 [-0.8940; 0.0198]        | 0.0608        | 0.2102           | 67.30%         |
| ## Omitting Y. Zhang, 2012     | -0.5738 [-0.9924; -0.1552]       | 0.0072        | 0.1609           | 61.40%         |
| ##                             |                                  |               |                  |                |
| ## Pooled estimate             | -0.4740 [-0.8746; -0.0733]       | 0.0204        | 0.1757           | 62.60%         |

#### Week 12

## Influential analysis (Random effects model)

##

| ##                                | SMD 95%-CI                        | p-value       | tau <sup>2</sup> | I <sup>2</sup> |
|-----------------------------------|-----------------------------------|---------------|------------------|----------------|
| ## Omitting Lin B-L,2017          | -0.6135 [-1.1331; -0.0940]        | 0.0206        | 0.5873           | 85.90%         |
| ## Omitting Mehdi M, 2013         | -0.6409 [-1.1266; -0.1551]        | 0.0097        | 0.5109           | 85.70%         |
| ## Omitting L. Peng, 2011         | -0.5756 [-1.0594; -0.0917]        | 0.0197        | 0.5119           | 85.90%         |
| ## Omitting L. Xu, 2014           | -0.4870 [-0.9426; -0.0315]        | 0.0361        | 0.4350           | 83.40%         |
| ## Omitting Y. Li,2015            | -0.6756 [-1.1539; -0.1972]        | 0.0056        | 0.4830           | 83.90%         |
| ## Omitting H. Lin,2012           | -0.5849 [-1.0874; -0.0825]        | 0.0225        | 0.5464           | 85.90%         |
| ## Omitting H. Luo,2015           | -0.6327 [-1.1537; -0.1117]        | 0.0173        | 0.5898           | 85.50%         |
| ## Omitting S. Ouyang,2013        | -0.6413 [-1.1476; -0.1349]        | 0.0131        | 0.5531           | 85.40%         |
| ## Omitting L. Tong,2015          | -0.6659 [-1.1490; -0.1829]        | 0.0069        | 0.4980           | 84.90%         |
| ## Omitting Y. Zhang,2012         | -0.5181 [-0.9911; -0.0452]        | 0.0318        | 0.4795           | 84.90%         |
| ## <b>Omitting L. Zhuang,2014</b> | <b>-0.3834 [-0.7204; -0.0465]</b> | <b>0.0257</b> | <b>0.1924</b>    | <b>68.60%</b>  |
| ##                                |                                   |               |                  |                |
| ## Pooled estimate                | -0.5844 [-1.0398; -0.1290]        | 0.0119        | 0.4854           | 84.40%         |

#### Week 24

## Influential analysis (Random effects model)

##

| ##                        | SMD 95%-CI                 | p-value | tau <sup>2</sup> | I <sup>2</sup> |
|---------------------------|----------------------------|---------|------------------|----------------|
| ## Omitting Lin B-L,2017  | -1.0104 [-1.9871; -0.0338] | 0.0426  | 1.6032           | 93.40%         |
| ## Omitting L. Peng, 2011 | -0.9854 [-1.8783; -0.0924] | 0.0306  | 1.3432           | 93.50%         |
| ## Omitting L. Xu, 2014   | -0.7400 [-1.5690; 0.0891]  | 0.0802  | 1.1343           | 92.20%         |

|                                   |                                  |               |               |               |
|-----------------------------------|----------------------------------|---------------|---------------|---------------|
| ## Omitting H. Lin,2012           | -1.0125 [-1.9531; -0.0718]       | 0.0349        | 1.4823        | 93.40%        |
| ## Omitting S. Ouyang,2013        | -1.0243 [-1.9921; -0.0565]       | 0.0380        | 1.5722        | 93.30%        |
| ## Omitting L. Tong,2015          | -1.0898 [-1.9846; -0.1951]       | 0.0170        | 1.3309        | 92.90%        |
| <b>## Omitting L. Zhuang,2014</b> | <b>-0.4228 [-0.8783; 0.0328]</b> | <b>0.0689</b> | <b>0.2726</b> | <b>74.50%</b> |
| ## Omitting Suk KT,2017           | -1.0151 [-1.9604; -0.0698]       | 0.0353        | 1.4974        | 93.40%        |
| ##                                |                                  |               |               |               |
| ## Pooled estimate                | -0.9109 [-1.7205; -0.1013]       | 0.0274        | 1.2406        | 92.50%        |
