# Supplementary material for: A pooled analysis of mesenchymal stem cell-based therapy for liver disease
Source: PubMed Central journal article supplement (PMC5863358; doi:10.1186/s13287-018-0816-2), 2018-03-21
Supplement: 13287_2018_816_MOESM7_ESM.pdf [file 13287_2018_816_MOESM7_ESM.pdf]

### Visualized results of publication bias of ALT

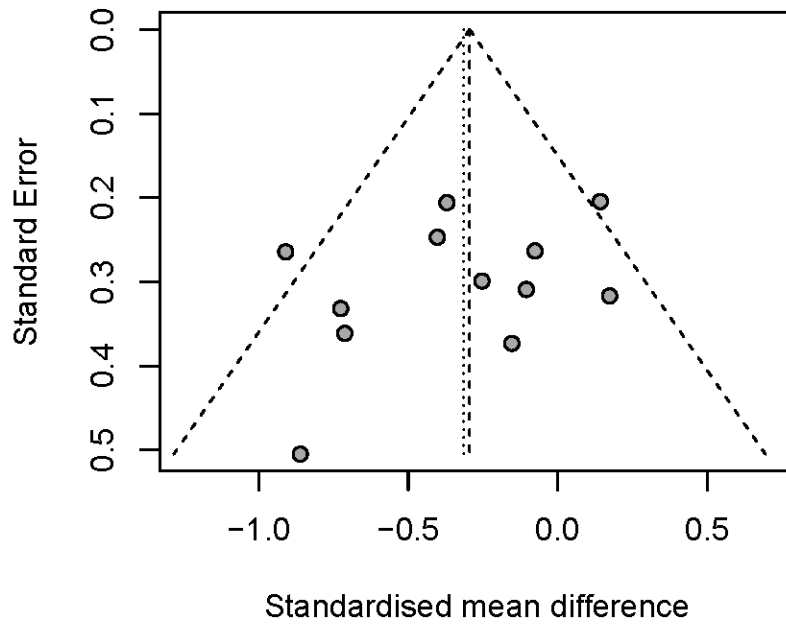

**Figure S4.** Bias assessment plot for ALT level at week 4

\* $p=0.29$

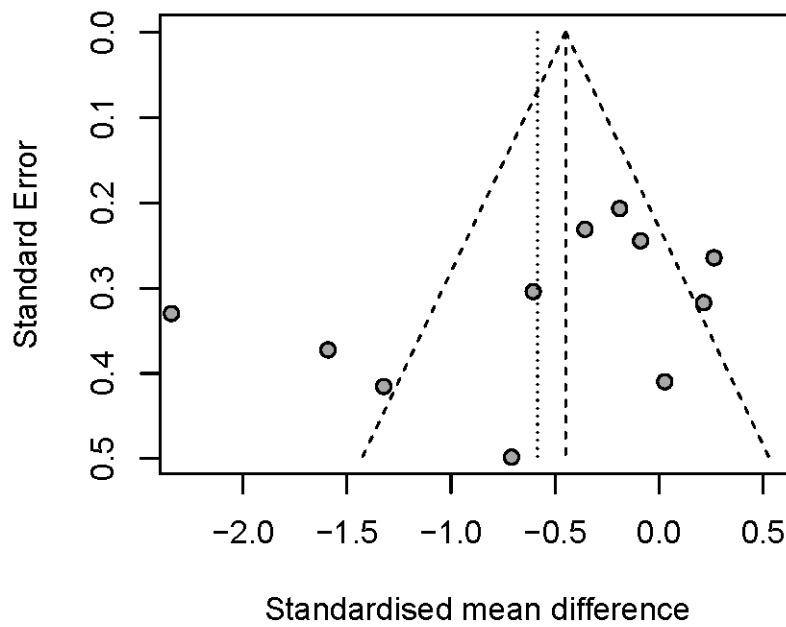

**Figure S5.** Bias assessment plot for ALT level at week 12

\* $p=0.19$
