# Supplementary material for: A pooled analysis of mesenchymal stem cell-based therapy for liver disease
Source: PubMed Central journal article supplement (PMC5863358; doi:10.1186/s13287-018-0816-2), 2018-03-21
Supplement: 13287_2018_816_MOESM8_ESM.pdf [file 13287_2018_816_MOESM8_ESM.pdf]

## Results of sensitivity analyses with omission of one study at a time:

\* Sensitivity analyses were not performed at weeks 36 and 48 because there were just two studies.

### --TbIL level

#### Week 2

## Influential analysis (Random effects model)

##

| ##                             | SMD 95%-CI                       | p-value       | tau <sup>2</sup> | I <sup>2</sup> |
|--------------------------------|----------------------------------|---------------|------------------|----------------|
| ## Omitting L. Peng, 2011      | -0.4290 [-0.8296; -0.0285]       | 0.0358        | 0.2674           | 72.80%         |
| ## Omitting Salama H,2014      | -0.3867 [-0.7948; 0.0213]        | 0.0632        | 0.2704           | 71.70%         |
| <b>## Omitting L. Xu, 2014</b> | <b>-0.2702 [-0.5681; 0.0276]</b> | <b>0.0753</b> | <b>0.0970</b>    | <b>48.40%</b>  |
| ## Omitting Z. Zhang, 2012     | -0.4372 [-0.8541; -0.0204]       | 0.0398        | 0.2866           | 72.70%         |
| ## Omitting H. Lin,2012        | -0.4542 [-0.8702; -0.0381]       | 0.0324        | 0.2835           | 72.20%         |
| ## Omitting B. Liu, 2013       | -0.3119 [-0.6622; 0.0384]        | 0.0810        | 0.1748           | 63.00%         |
| ## Omitting H. Luo,2015        | -0.4601 [-0.8923; -0.0279]       | 0.0369        | 0.3082           | 71.30%         |
| ## Omitting L. Tong,2015       | -0.4933 [-0.8819; -0.1048]       | 0.0128        | 0.2340           | 68.60%         |
| ## Omitting J. Yu,2012         | -0.4264 [-0.8390; -0.0137]       | 0.0428        | 0.2812           | 72.80%         |
| ## Omitting Y. Zhang,2012      | -0.4858 [-0.8756; -0.0959]       | 0.0146        | 0.2406           | 69.90%         |
| ##                             |                                  |               |                  |                |
| ## Pooled estimate             | -0.4151 [-0.7866; -0.0437]       | 0.0285        | 0.2414           | 69.40%         |

#### Week 4

## Influential analysis (Random effects model)

##

| ##                             | SMD 95%-CI                        | p-value       | tau <sup>2</sup> | I <sup>2</sup> |
|--------------------------------|-----------------------------------|---------------|------------------|----------------|
| ## Omitting Lin B-L,2017       | -0.4457 [-0.7567; -0.1348]        | 0.0050        | 0.2398           | 72.70%         |
| ## Omitting L. Peng, 2011      | -0.3968 [-0.6868; -0.1068]        | 0.0073        | 0.2079           | 72.30%         |
| ## Omitting Salama H,2014      | -0.3891 [-0.6815; -0.0966]        | 0.0091        | 0.2065           | 71.50%         |
| <b>## Omitting L. Xu, 2014</b> | <b>-0.2622 [-0.4694; -0.0549]</b> | <b>0.0132</b> | <b>0.0657</b>    | <b>45.00%</b>  |
| ## Omitting Z. Zhang, 2012     | -0.4329 [-0.7335; -0.1323]        | 0.0048        | 0.2228           | 72.90%         |
| ## Omitting H. He,2015         | -0.4566 [-0.7633; -0.1499]        | 0.0035        | 0.2305           | 71.90%         |
| ## Omitting Y. Li,2015         | -0.4490 [-0.7513; -0.1467]        | 0.0036        | 0.2239           | 72.50%         |
| ## Omitting H. Lin,2012        | -0.4134 [-0.6945; -0.1324]        | 0.0039        | 0.2033           | 70.90%         |
| ## Omitting H. Luo,2015        | -0.4671 [-0.7623; -0.1719]        | 0.0019        | 0.2065           | 69.70%         |
| ## Omitting S. Ouyang,2013     | -0.4169 [-0.7215; -0.1124]        | 0.0073        | 0.2280           | 72.60%         |
| ## Omitting L. Tong,2015       | -0.4572 [-0.7519; -0.1625]        | 0.0024        | 0.2106           | 71.80%         |
| ## Omitting Q. Wang,2013       | -0.4051 [-0.6943; -0.1159]        | 0.0060        | 0.2098           | 72.70%         |
| ## Omitting J. Yu,2012         | -0.4204 [-0.7187; -0.1220]        | 0.0058        | 0.2197           | 72.90%         |
| ## Omitting Y. Zhang,2012      | -0.3298 [-0.5901; -0.0696]        | 0.0130        | 0.1494           | 65.10%         |
| ## Omitting M. Zhu,2013        | -0.4354 [-0.7363; -0.1345]        | 0.0046        | 0.2231           | 72.90%         |
| ## Omitting L. Zhuang,2014     | -0.4428 [-0.7479; -0.1377]        | 0.0044        | 0.2292           | 72.80%         |
| ##                             |                                   |               |                  |                |
| ## Pooled estimate             | -0.4134 [-0.6945; -0.1324]        | 0.0039        | 0.2033           | 70.90%         |

### Week 8

## Influential analysis (Random effects model)

##

| ##                               | SMD 95%-CI                       | p-value       | tau <sup>2</sup> | I <sup>2</sup> |
|----------------------------------|----------------------------------|---------------|------------------|----------------|
| ## Omitting Lin B-L,2017         | -0.7647 [-1.4391; -0.0903]       | 0.0263        | 0.6899           | 88.10%         |
| ## Omitting L. Xu, 2014          | -0.4871 [-1.0734; 0.0992]        | 0.1035        | 0.5066           | 86.40%         |
| ## Omitting Z. Zhang, 2012       | -0.7076 [-1.3664; -0.0488]       | 0.0353        | 0.6611           | 88.90%         |
| ## Omitting H. He,2015           | -0.6986 [-1.4065; 0.0093]        | 0.0531        | 0.7705           | 88.80%         |
| ## Omitting Y. Li,2015           | -0.7389 [-1.4106; -0.0671]       | 0.0311        | 0.6867           | 88.70%         |
| ## Omitting H. Lin,2012          | -0.7589 [-1.4050; -0.1128]       | 0.0213        | 0.6301           | 88.30%         |
| ## <b>Omitting Y. Zhang,2012</b> | <b>-0.2463 [-0.5818; 0.0892]</b> | <b>0.1502</b> | <b>0.1267</b>    | <b>63.30%</b>  |
| ## Omitting M. Zhu,2013          | -0.7069 [-1.3679; -0.0460]       | 0.0361        | 0.6656           | 88.90%         |
| ##                               |                                  |               |                  |                |
| ## Pooled estimate               | -0.6165 [-1.1920; -0.0411]       | 0.0357        | 0.5665           | 87.10%         |

### Week 12

## Influential analysis (Random effects model)

##

| ##                               | SMD 95%-CI                        | p-value            | tau <sup>2</sup> | I <sup>2</sup> |
|----------------------------------|-----------------------------------|--------------------|------------------|----------------|
| ## Omitting D Zhang,2016         | -0.6193 [-0.9214; -0.3172]        | < 0.0001           | 0.2494           | 74.10%         |
| ## Omitting Lin B-L,2017         | -0.6470 [-0.9357; -0.3583]        | < 0.0001           | 0.2181           | 70.90%         |
| ## Omitting L. Peng, 2011        | -0.5894 [-0.8802; -0.2985]        | < 0.0001           | 0.2333           | 74.00%         |
| ## Omitting Salama H,2014        | -0.5818 [-0.8763; -0.2874]        | 0.0001             | 0.2352           | 73.60%         |
| ## Omitting L. Xu, 2014          | -0.5066 [-0.7612; -0.2520]        | < 0.0001           | 0.1554           | 65.20%         |
| ## Omitting Z. Zhang, 2012       | -0.6089 [-0.9074; -0.3104]        | < 0.0001           | 0.2439           | 74.20%         |
| ## Omitting H. He,2015           | -0.6287 [-0.9351; -0.3224]        | < 0.0001           | 0.2569           | 73.60%         |
| ## Omitting Y. Li,2015           | -0.6323 [-0.9302; -0.3344]        | < 0.0001           | 0.2400           | 73.40%         |
| ## Omitting H. Lin,2012          | -0.6342 [-0.9289; -0.3395]        | < 0.0001           | 0.2343           | 73.30%         |
| ## Omitting B. Liu, 2013         | -0.6305 [-0.9216; -0.3395]        | < 0.0001           | 0.2304           | 73.50%         |
| ## Omitting H. Luo,2015          | -0.5892 [-0.8925; -0.2859]        | 0.0001             | 0.2503           | 73.40%         |
| ## Omitting S. Ouyang,2013       | -0.6198 [-0.9231; -0.3164]        | < 0.0001           | 0.2517           | 74.10%         |
| ## Omitting L. Tong,2015         | -0.6416 [-0.9314; -0.3519]        | < 0.0001           | 0.2242           | 72.50%         |
| ## <b>Omitting Y. Zhang,2012</b> | <b>-0.4964 [-0.7363; -0.2565]</b> | <b>&lt; 0.0001</b> | <b>0.1317</b>    | <b>61.70%</b>  |
| ## Omitting L. Zhuang,2014       | -0.5694 [-0.8619; -0.2769]        | 0.0001             | 0.2281           | 72.40%         |
| ## Omitting El-Ansary M,2012     | -0.5710 [-0.8592; -0.2828]        | 0.0001             | 0.2256           | 73.30%         |
| ##                               |                                   |                    |                  |                |
| ## Pooled estimate               | -0.5970 [-0.8774; -0.3165]        | < 0.0001           | 0.2242           | 72.40%         |

### Week 24

## Influential analysis (Random effects model)

##

| ##                       | SMD 95%-CI                 | p-value | tau <sup>2</sup> | I <sup>2</sup> |
|--------------------------|----------------------------|---------|------------------|----------------|
| ## Omitting Lin B-L,2017 | -0.5147 [-0.9322; -0.0973] | 0.0157  | 0.3380           | 76.50%         |

|                                |                                  |               |               |               |
|--------------------------------|----------------------------------|---------------|---------------|---------------|
| ## Omitting L. Peng, 2011      | -0.4421 [-0.8696; -0.0145]       | 0.0427        | 0.3757        | 80.40%        |
| ## Omitting Salama H,2014      | -0.3694 [-0.7840; 0.0452]        | 0.0808        | 0.3385        | 78.00%        |
| ## Omitting Suk KT,2017        | -0.4844 [-0.9237; -0.0451]       | 0.0307        | 0.3890        | 79.70%        |
| <b>## Omitting L. Xu, 2014</b> | <b>-0.2554 [-0.5457; 0.0348]</b> | <b>0.0845</b> | <b>0.1205</b> | <b>56.60%</b> |
| ## Omitting Z. Zhang, 2012     | -0.4484 [-0.8908; -0.0060]       | 0.0470        | 0.3981        | 80.40%        |
| ## Omitting H. Lin,2012        | -0.5074 [-0.9311; -0.0837]       | 0.0189        | 0.3553        | 78.40%        |
| ## Omitting S. Ouyang,2013     | -0.4433 [-0.8983; 0.0118]        | 0.0562        | 0.4229        | 80.40%        |
| ## Omitting L. Tong,2015       | -0.4859 [-0.9208; -0.0510]       | 0.0286        | 0.3811        | 79.70%        |
| ## Omitting L. Zhuang,2014     | -0.3917 [-0.8235; 0.0401]        | 0.0754        | 0.3707        | 78.60%        |
| ## Omitting El-Ansary M,2012   | -0.4526 [-0.8851; -0.0200]       | 0.0403        | 0.3821        | 80.40%        |
| ##                             |                                  |               |               |               |
| ## Pooled estimate             | -0.4344 [-0.8350; -0.0339]       | 0.0335        | 0.3495        | 78.30%        |
