# Supplementary material for: A pooled analysis of mesenchymal stem cell-based therapy for liver disease
Source: PubMed Central journal article supplement (PMC5863358; doi:10.1186/s13287-018-0816-2), 2018-03-21
Supplement: 13287_2018_816_MOESM9_ESM.pdf [file 13287_2018_816_MOESM9_ESM.pdf]

**Visualized results of publication bias of TBIl**

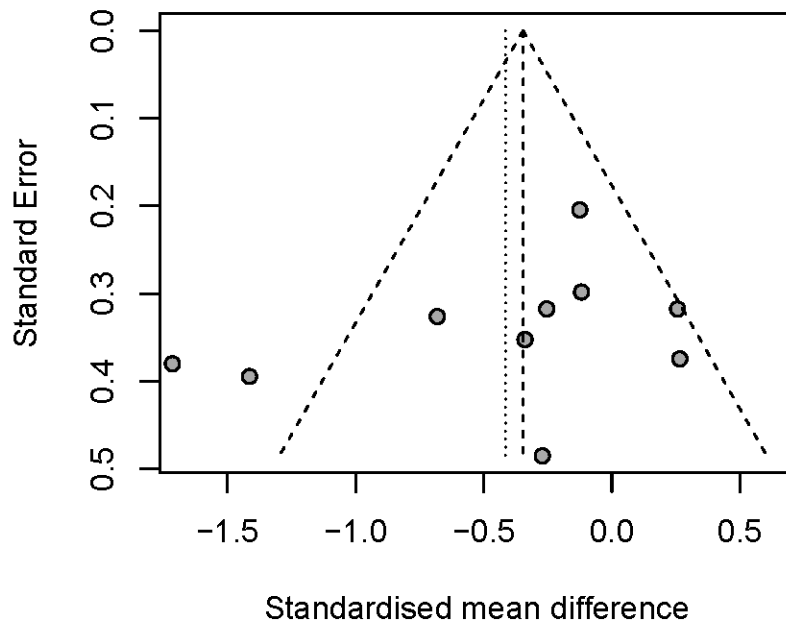

**Figure S6. Bias assessment plot for TBIl level at week 2**

\* $p=0.28$

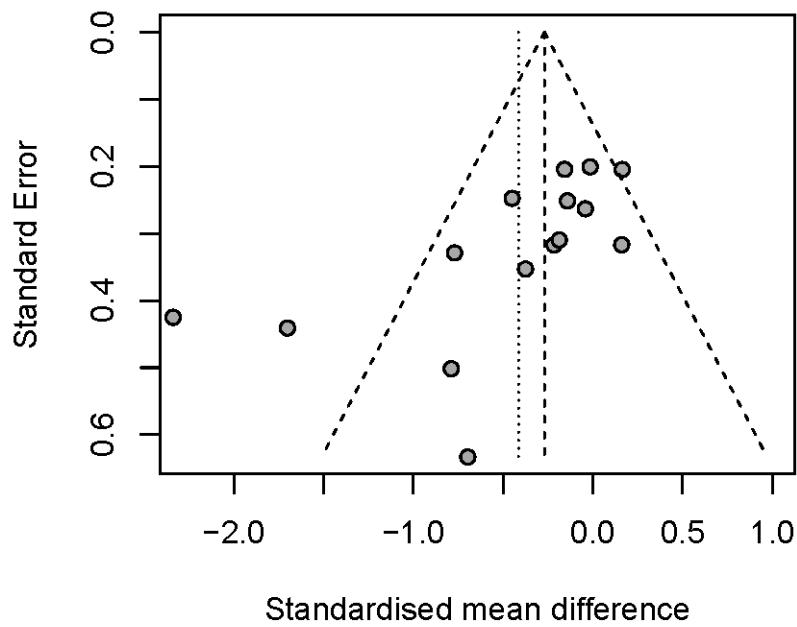

**Figure S7. Bias assessment plot for TBIl level at week 4**

\* $p<0.01$

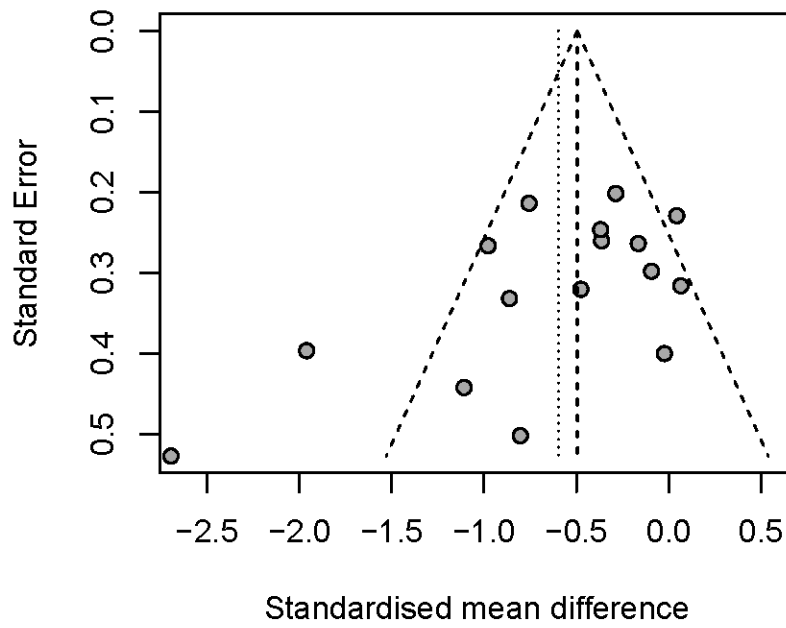

**Figure S8.** Bias assessment plot for TBI level at week 12

*\*p=0.04*

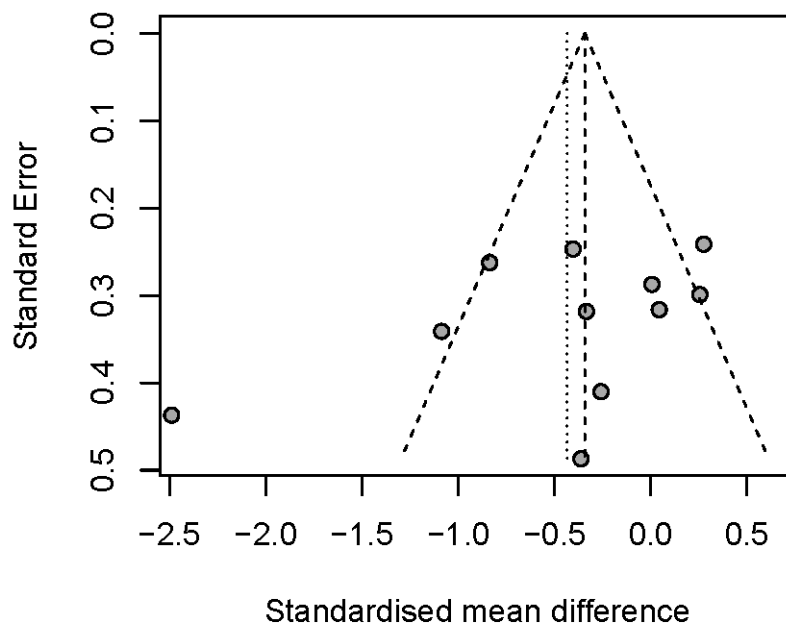

**Figure S9.** Bias assessment plot for TBI level at week 24

*\*p=0.17*
