# Supplementary material for: A pooled analysis of mesenchymal stem cell-based therapy for liver disease
Source: PubMed Central journal article supplement (PMC5863358; doi:10.1186/s13287-018-0816-2), 2018-03-21
Supplement: 13287_2018_816_MOESM10_ESM.pdf [file 13287_2018_816_MOESM10_ESM.pdf]

**Results of symmetrical contour-enhanced funnel plots combined with trim and fill analysis of TBiL:**

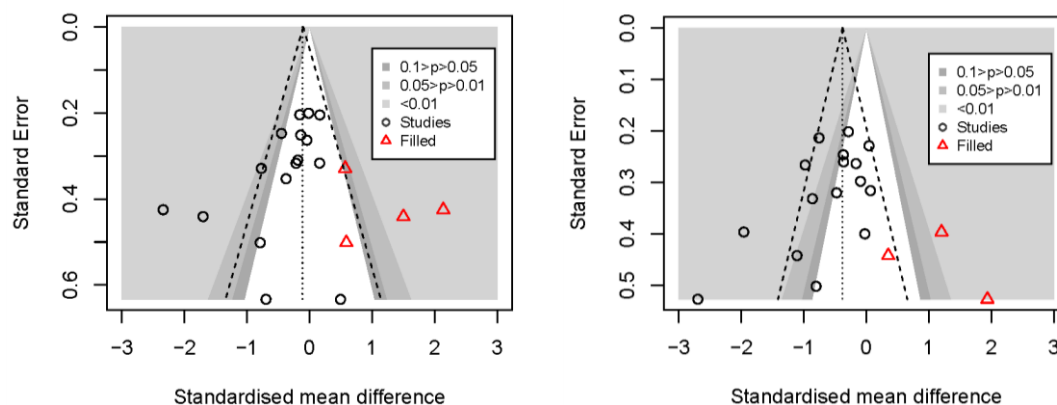

**Figure S11 Symmetrical contour-enhanced funnel plots for TBiL at weeks 4 and 12**

At week 4, four hypothetical studies were filled: three plotted in the area of statistical significant and one in the area of statistical nonsignificant; at week 12, three hypothetical studies were filled: two plotted in the area of statistical significant and one in the area of statistical nonsignificant, indicating that the asymmetry was partly caused by publication bias.
